# Supplementary material
Source: PubMed Central journal article supplement (PMC5492176)
Supplement: MCB.00048-17_zmb014171524s1.pdf [file MCB.00048-17_zmb014171524s1.pdf]

## Supplemental Information

*“CREBH Maintains Circadian Glucose Homeostasis by Regulating Hepatic Glycogenolysis and Gluconeogenesis” by H. Kim, Z. Zheng, P. Walker, G. Kapatos, and K. Zhang.*

### **Material and Methods**

***Immunoblotting analyses*** - Total cell lysates were prepared from mouse livers or cultured cells using RIPA cell lysis buffer (1% NP-40; 50mM Tris-HCl, pH 8.0; 150mM NaCl; 5mM NaF; 1mM sodium vanadate; 0.5% sodium deoxycholate; 0.1% SDS) supplemented with protease inhibitor cocktail (Sigma, P2714). Protein concentration of the whole lysates was determined using a Bradford assay (BioRad). Denatured proteins were separated by SDS-PAGE on 8-15% Tris-glycine polyacrylamide gels and transferred to a 0.45-mm PVDF membrane (GE Healthcare). Membrane-bound antibodies were detected using an enhanced chemiluminescence (ECL) detection reagent (GE Healthcare) and Bio-Rad imaging system. Levels of  $\beta$ -actin, tubulin, or GAPDH were determined as loading controls. The signal intensities were determined by Quantity One 4.6.7 (Bio-RadLife Science, CA). A rabbit polyclonal CREBH antibody has been developed in our laboratory and was used to detect the endogenous CREBH protein levels from mouse liver tissue (Kim et al. 2014). The commercially available antibodies were used to detect endogenous protein levels of C/EBP $\beta$ , E4BP4, G6PC, FADS2, CPT1 $\alpha$ , BDH1, ApoA4 (Santa Cruz Biotech), LXR $\alpha$  (Invitrogen), HNF4 $\alpha$  (Invitrogen), SREBP1c (Thermo Scientific), CLOCK (Cell Signaling), BMAL1 (Novus Biologicals), PPAR $\alpha$  (Millipore), PCK1 (Sigma), ACC1 (Epitomics), FGF21 (R&D Systems),  $\beta$ -actin (Sigma), tubulin (Sigma), and GAPDH (Sigma), respectively, in mouse liver lysates.

***Immunoprecipitation (IP)-Western blot analyses*** - Endogenous protein-protein interactions between CREBH and E4BP4, PPAR $\alpha$ , or CEBP $\beta$  in mouse livers across the day-night cycle were determined by IP-Western blot analysis. Approximately 200  $\mu$ g of liver protein lysates were incubated with 1  $\mu$ g of a rabbit anti-mouse CREBH antibody overnight at 4°C, as indicated in Figure 5A. The rabbit polyclonal CREBH antibody used for pulling down the endogenous CREBH protein was developed in our laboratory (Kim et al. 2014). Protein complexes were immunoprecipitated using Dynabeads Protein G (Novex), resolved by SDS-PAGE, and then transferred to PVDF membrane. The assay was followed by Western blot analysis with primary antibodies directed against E4BP4, PPAR $\alpha$ , or CEBP $\beta$ . The protein interaction signals were visualized by using HRP-conjugated Clean-Blot IP Detection Reagents (Thermo Scientific), which can eliminate detection-interference from both heavy-chain and light-chain IgG fragments of the antibodies used for the initial IP assay. Conjugated HRP was then developed using an enhanced chemiluminescence (ECL) detection reagent (GE Healthcare).

***Mouse liver nuclei preparation for ChIP assays*** – Mouse liver tissues were homogenized using a Teflon pestle in 1:10 (w:v) of ice-cold NP-40 Lysis Buffer supplemented with protease inhibitor cocktail. The liberation of nuclei was monitored by DAPI staining and fluorescence microscopy. To purify the intact nuclei, lysates were then layered over 1M (bottom) and 0.68M (top) of sucrose, and spun at 4620 g for 30 min at 4°C. Following a washing step, nuclear pellets were cross-linked with 1% fresh formaldehyde in PBS for 10 min at room temperature. Cross-linking was terminated by addition of 200mM Tris-HCl (pH 9.4) and 1mM DTT for 10 min and centrifuged at 1160 g for 15 min at 4°C. Nuclear pellets were suspended in SDS lysis buffer containing protease inhibitors, incubated for 10 min on ice, and sonicated in a cold-water bath using chiller circulator-equipped Bioruptor Sonication Device (Diagenode) (Kapatos et al. 2007; Kfoury and Kapatos 2009).

***Luciferase gene expression reporter analysis*** - To construct the *Pck1* gene promoter-driven expression reporter plasmid (pGL3-Pck1), the 5'-flanking region from -385 nt to -36 nt of the mouse *Pck1* gene was amplified from mouse cDNA by PCR using the forward primer 5'-ATGGTACCGCAGCCAGCAACATATGAAG-3' and the reverse primer 5'-ATGAGCTCATAGAAGGGAGGACAGCCCT-3'. PCR products were digested using KpnI and SacI restriction enzymes and cloned into the same sites of the pGL3-basic vector (Promega, USA). The identity of the cloned plasmid was verified by sequence analysis. For the luciferase assay, 1µg of pGL3-Pck1 plasmids and 0.1µg of pGL4.7 plasmids were transiently co-transfected into Hepa1-6 cells using the TransIT-2020 reagent (Mirus Bio, WI). After 24 hour, co-transfected cells were infected with adenovirus expressing GFP (Ade-GFP), activated CREBH (Ade-CREBH), PPAR $\alpha$  (Ade-PPAR $\alpha$ ), E4BP4 (Ade-E4BP4), and/or C/EBP $\beta$  (Ade-C/EBP $\beta$ ), as indicated in Figure 5B-C. Cells were harvested and lysed at 24 hrs after transfection. Luciferase activity was measured using the Dual-Luciferase Assay System (Promega) according to the manufacturer's instructions. The reporter expression readout was presented by normalizing Firefly luciferase activities to Renilla luciferase activities (internal control). Each reporter assay was performed in duplicate.

***Histological staining and quantitative analysis of hepatic glycogen*** - Periodic-acid staining of hepatic glycogen was performed according to the standard protocol (Zhang et al. 2012; Zheng et al. 2013). Briefly, tissue samples were collected from similar liver lobe regions of CREBH-null and WT control mice under the circadian clock and then fixed in 10% formalin. Formalin-fixed, paraffin-embedded liver tissue was sectioned on a cryostat, and sections were deparaffinized, re-hydrated, and oxidized in 0.5% periodic acid solution for 5min. The oxidized tissue sections were incubated in Schiff's reagent (Sigma) for 15 min. Biochemical quantification of hepatic glycogen in the liver tissues of CREBH-null and WT control mice

under the circadian clock was performed using a commercial enzymatic kit (BioAssay Systems, Hayward, CA) (Zhang et al. 2012; Zheng et al. 2013). Approximately 40 mg of liver tissue from similar lobe regions of CREBH null and control mice were homogenized in ice-cold citrate buffer (0.1M, pH 4.2). Homogenates were immediately subjected to glycogen measurement using the glycogen assay kit following the manufacturer's instruction. Levels of hepatic glycogen were presented after normalization to liver mass.

### **Supplemental figure legends**

*S-Figure 1. (A)* Quantification of PYGL, PCK1, and G6PC protein levels in the livers of CREBH-null and WT control mice under feeding or after 6-, 12- and 24-hour fasting. Fold changes of protein levels are shown by comparing to that of the mouse under the feeding condition. Each bar donates mean  $\pm$  SEM. Levels of  $\beta$ -actin were determined as loading controls. *(B)* Quantification of PYGL, PCK1, and G6PC protein levels in the livers of mice over-expressing GFP or activated CREBH. Fold changes of protein levels are shown by comparing to that of one of the control mice over-expressing GFP. Each bar donates mean  $\pm$  SEM (n=3 mice per group). Levels of  $\beta$ -actin were determined as loading controls.

*S-Figure 2. Expression levels of Gsk3 $\beta$ , Ugp2, Phka2, Gbe, and Agl mRNAs in the livers of CREBH-null and WT control mice under feeding or fasting for 6, 12, and 24 hours.* Expression levels of mRNAs were determined by qRT-PCR. Fold changes of mRNA levels are shown by comparing to that of one of the wild-type control mice under the feeding condition. Each bar denotes mean  $\pm$  SEM (n = 3-4 mice per time point). \* p < 0.05; \*\* p < 0.01..

*S-Figure 3. Rhythmic expression of GYS2 in CREBH-null and WT control mouse livers under the circadian clock. (A)* Expression levels of the Gys2 mRNA in the livers of CREBH-null and WT mice under the circadian clock. Expression levels of mRNAs were determined by qRT-PCR. Fold changes of mRNA levels are shown by comparing to that of one of the wild-type control mice at the starting circadian time point. Each bar denotes mean  $\pm$  SEM (n = 3-5 mice per group per time point). *(B)* Western blot analysis of rhythmic levels of GYS2 protein in CREBH-null and WT mouse livers collected every 4 hours in a 24-hour circadian period. Pooled liver protein lysates from 3-5 mice per time point per genotype group were used. Levels of  $\beta$ -actin were determined as the loading controls.

*S-Figure 4. Potential CREBH- and PPAR $\alpha$ - binding sequences in the promoter region of mouse Pck1, Pygl, and G6pc genes.* The binding motifs are highlighted. The complementary sequence is presented if the binding motif locates in the negative strand. The *Pck1* gene promoter oligo probe sequences used for EMSA analysis were listed. The probe contains the integrated CREBH-PPAR $\alpha$  binding motif in the *Pck1* gene promoter region. The complimentary oligo sequence to the CREBH-PPAR $\alpha$  motif was shown.

*S-Figure 5.* Quantification of PYGL, PCK1, and G6PC protein levels in the pooled livers of CREBH-null and WT control mice under the circadian clock (n=3 mice/genotype/time point). CREBH protein signal intensity, determined by Western blot densitometry, was normalized to that of GAPDH. Fold changes of protein levels are shown by comparing to that of at 6 pm.

*S-Table 1. Primer sequences used for real-time qPCR, ChIP-qPCR, and EMSA in this study*

## **References**

- Bishop C, Walker PD. 2004. Intranigral antagonism of neurokinin 1 and 3 receptors reduces intrastriatal dopamine D1 receptor-stimulated locomotion in the rat. *Brain Res* **1023**: 126-133.
- Kapatos G, Vunnavu P, Wu Y. 2007. Protein kinase A-dependent recruitment of RNA polymerase II, C/EBP beta and NF-Y to the rat GTP cyclohydrolase I proximal promoter occurs without alterations in histone acetylation. *J Neurochem* **101**: 1119-1133.
- Kfoury N, Kapatos G. 2009. Identification of neuronal target genes for CCAAT/enhancer binding proteins. *Mol Cell Neurosci* **40**: 313-327.
- Kim HB, Mendez R, Zheng Z, Chang L, Cai J, Zhang R, Zhang K. 2014. Liver-Enriched Transcription Factor CREBH Interacts with Peroxisome Proliferator-Activated Receptor alpha to Regulate Metabolic Hormone FGF21. *Endocrinology*: en20131490.
- Shimomura K, Kumar V, Koike N, Kim TK, Chong J, Buhr ED, Whiteley AR, Low SS, Omura C, Fenner D et al. 2013. Usf1, a suppressor of the circadian Clock mutant, reveals the nature of the DNA-binding of the CLOCK:BMAL1 complex in mice. *Elife* **2**: e00426.
- Zhang C, Wang G, Zheng Z, Maddipati KR, Zhang X, Dyson G, Williams P, Duncan SA, Kaufman RJ, Zhang K. 2012. Endoplasmic reticulum-tethered transcription factor cAMP responsive element-binding protein, hepatocyte specific, regulates hepatic lipogenesis, fatty acid oxidation, and lipolysis upon metabolic stress in mice. *Hepatology* **55**: 1070-1082.
- Zheng Z, Xu X, Zhang X, Wang A, Zhang C, Huttemann M, Grossman LI, Chen LC, Rajagopalan S, Sun Q et al. 2013. Exposure to ambient particulate matter induces a NASH-like phenotype and impairs hepatic glucose metabolism in an animal model. *J Hepatol* **58**: 148-154.

**A**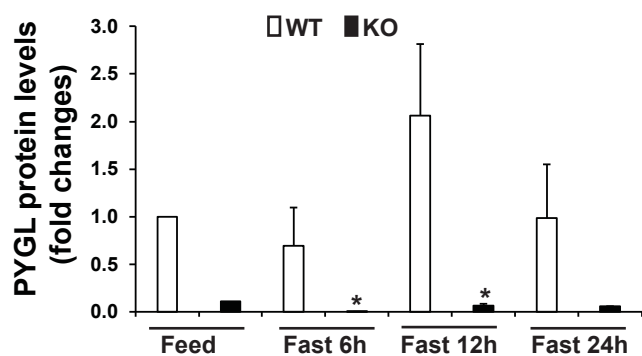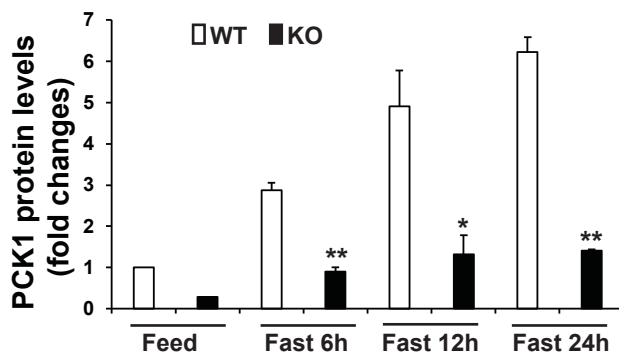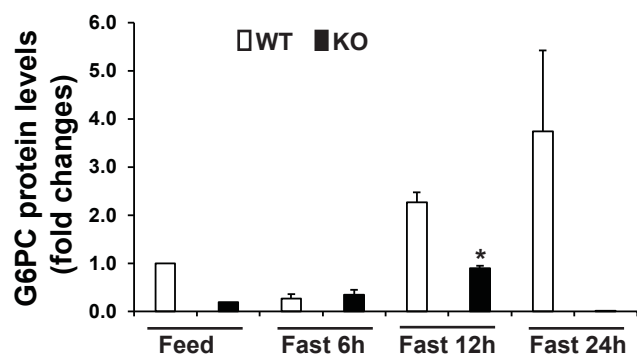**B**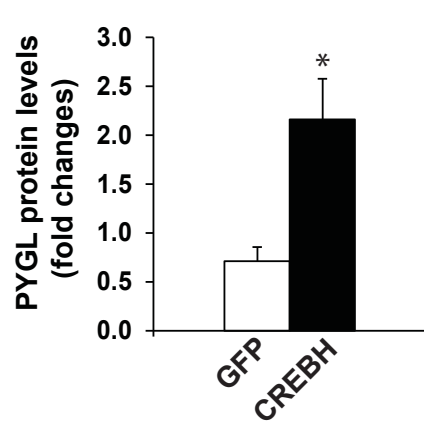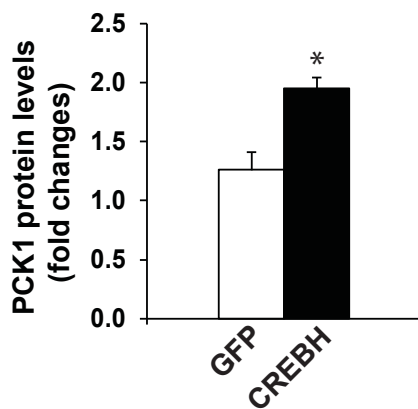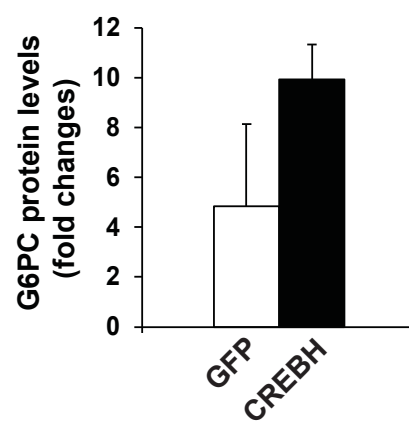

A

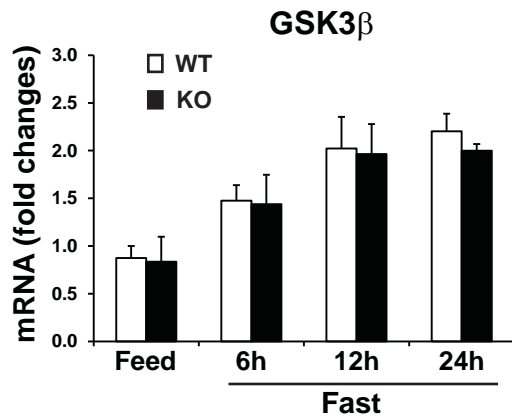

B

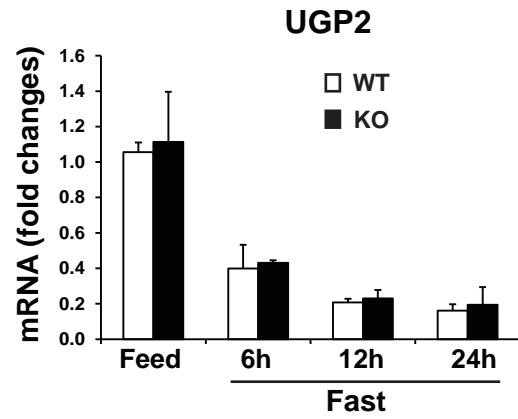

C

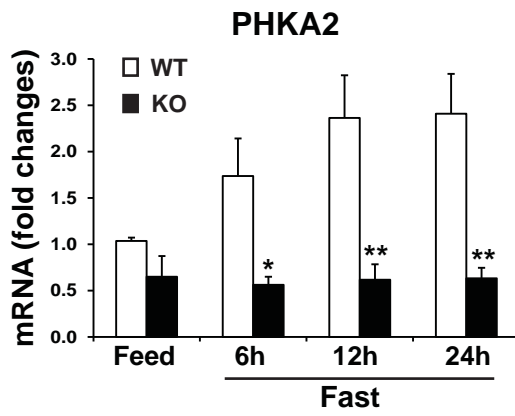

D

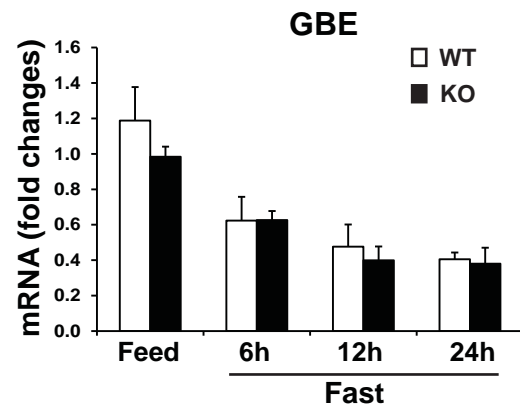

E

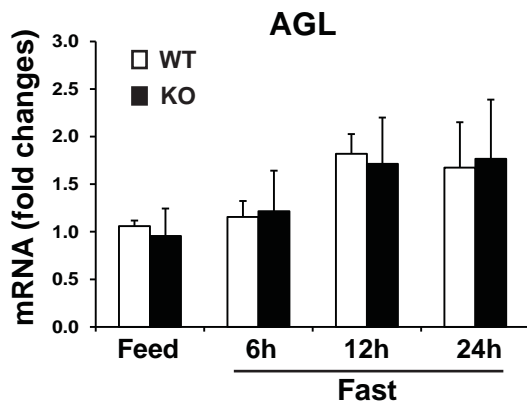



**A**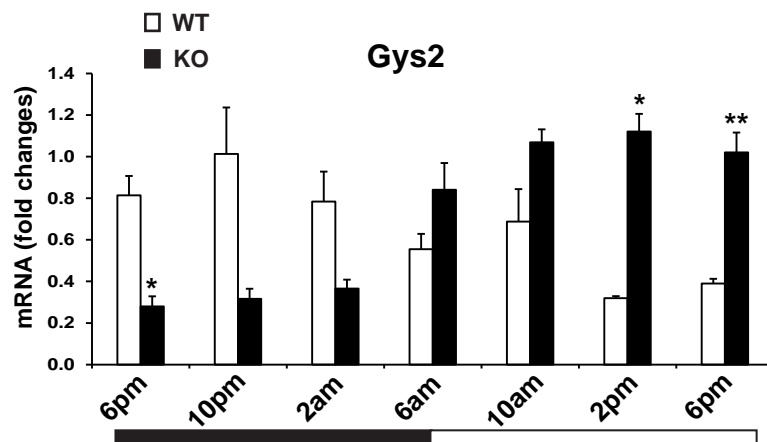**B**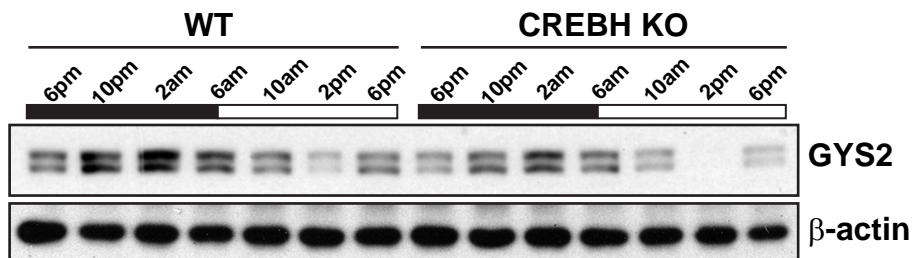

A

### Transcription factor binding elements in mouse *Pck1* gene promoter region

nt -575

PPAR $\alpha$   
 TGAATTCCTTCTCATGACCTTTGGCCGTGGGAGCREBHTGACACCTCACAGCTGTGGTGTTTTGACAACCAGCAGCC  
ACTGGAAA  
 ACCGGCACACAAAATGTGCAGCCAGCAACATATGAAGTCCAAGAGGCACAACCAGCAGCCACCGGCACACA  
 AAATGTGCAGCCAGCAACATATGAAGTCCAAGAGGCGTCTCGGCTAGGCCTGCCCTTGACCCCCACCCREBHTGACA  
 ATTAAGGCAAGAGCCTGCAGTTTGCATCAGCAACAGGCAGGGTCAAAGTTTAGTCAATCAAATGTTGTGTAAG  
 GACTCACTATG GCTGATAGAG GGGCCTGAGG CCTCCCAACATTCATTAACA ACCACAAGTT CAATCATTAT  
 CTCCTGGAGTTTATTGTGTTAAGTCAGTTCCAAACCGTGCTGACCATGGCTATGATCCPPAR $\alpha$ AAAGGCCTGCCCCTT  
 ACGTCAGAGGCGAGCCTCCGGGTCCAGCTGAGGGGCAGGGCTGTCTCCCTTCTATATAGTATTTAAAGCAA  
 GGAGGGCGGGCTACCAAGCACAGTTGGCCTTCCCTCTGGGAACACACCCTCGGTCAACAGGGGAAATCCGG  
 CAAGGCGCTCAGCGATCTCTGATCCAGACCTTCCAAAAGGAAGAAAGGTAGGCAGGGTTSS

mPCK1 EMSA-F-1 : 5'-Biotin-CCTTCTCATGACCTTTGGCCGTGGGAGTGACACCTCACAG-3'

mPCK1 EMSA-R-1 : 5'-Biotin-CTGTGAGGTGTCACTCCCACGGCCAAAGGTCATGAGAAGG-3'

B

### Transcription factor binding elements in mouse *Pygl* gene promoter region

nt -540

CAAAGAGCAGTGCAAACAAGGGGTCTCAAATCGAACGAAGTCTTGTCCCCACTGAGACTAAAGCTTTCTCAAC  
 AGACCCCTTGACTTTTACACCAACTGTGGCCAACTACTGTGGGTTAGTCCAGCCTGGGCCTAGGAGTCAAGAAAC  
 CCCAGTCCTGCGTCCTCAGAAAAAATAAATAAACCAACCAACCAAGGCCCCCTTAGAACCCAGGATAGTACTAT  
 GCCTA AAAACTGGGAAGCAAGACCGGGGCAATCAGGGTTAAATCACACTGACCCTACAATGTCACCCTGGGAAGC  
 AACCGTGGAACCCACTGAGAAGAGGCAATGGCTTTACTGGGAACTCAACAAGCGAGCCAGCCGAGGCCTCCTTCC  
 ACACCGAGAGACGCGGTCAGAGCCTTTGCGCACTACGCREBHTGACCTGGACGTTCTGGGAGCGGCCGAGGGGCGGTGC  
 CCGCAGCCGCAGCACCGCCCTGGGGCTCCCACGCCCCCTGGGGGGGCREBHCGTCAGCAGTCTCTGGGAGCCACGGGTGGGC  
 GGAACCCGGAGAGGGGCGTSS

C

## Transcription factor binding elements in mouse *G6pc* gene promoter region

nt -925

GTGTCTGTGATCGC **CREBH** **TGACCTCA** GAGACACCTTCTGTGTCCTCTTTCCTATCTGGAACCATCCCCTA  
 ATCTATACACACATGTGTACACACTAGATGAAAAACATTTTAAATCTTTTAAAATGTTTTTTTTAAAT  
 ATTTTATCTCATGTGCATTGGTGGCTTTTTGCTGCAGGTATATCTCTGTAAAGCTGTTGGATCCTCT  
 AGAACTGAGTCAGTTACAGACATTTGTCATGTGGGTGCTGGAAAC **PPAR $\alpha$**  **TGACCC** CAGGTCCTCTTGAAG  
 ACCATCCAGTGCTCTTAACCACTGAGCCATCTCTCCAACCCAGGGAAAAAACATTTTAAAGGATT  
 GTTTTCTTGCCCTAAGAAGTATAAACTCAATATTGGAGACACTGTTGGCTGCCCAAACCAGAGGTG  
 GACCCAGATCCACGTGAACTTGGTGAAAGTCCAAGAGAGTGAGCATTTCAGGACAACAAAGCC  
 CTA CTGCTGTGTATTTTGTATATTTTAAATTAATAACTTAA **PPAR $\alpha$**  **AGGTCA** **TCCAGT** CTTCGGCAGTAGCAA ACTTC  
 CCTTTGTCTTCAAATAGATATAATTGCAGACTTCAAAAAACAGATGCCCTTGCAAGAGTCATGGTTGA  
 AACAGACTCTGCCCTGGGCCTCTGGCCTGGCTTCAAGGACCAGGAAGGAGGGCAGCCTCTAGCAC  
 TGCAAGCAGTGTGCCAAGTTAATAATTGGCTCTGCCAATGGCGATCAGGCTGTTTTTGTGTGCCTG  
 TTTTGCTATTTTACGTAAATCACCCCTGAACATGTTTGCATCAACCTACTGATGATGCACCTTTGATCAAT  
 AGATTTTAGACAAAAGTGTTTTTTGAGTCCAAGATCAGGGCTGGAT **PPAR $\alpha$**  **TGACCT** ACAGACTGAATCCA  
 GGGCATATAAACAGGGGCAAGGCACAGACTGATAGCAGAGGGATCAAG **TSS**

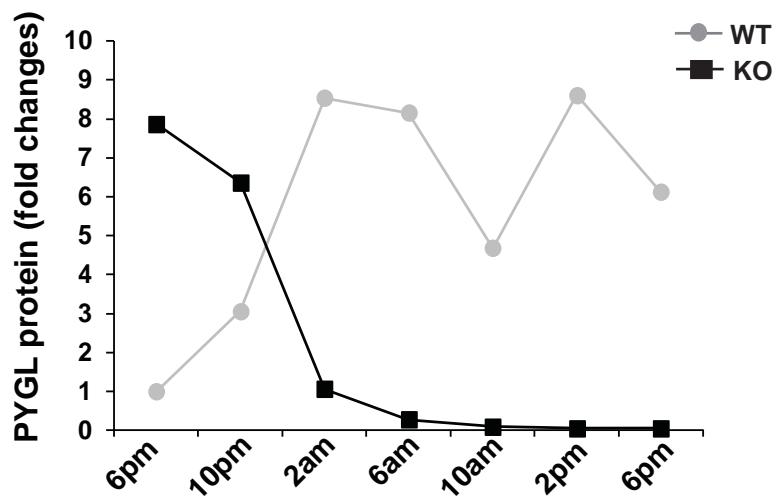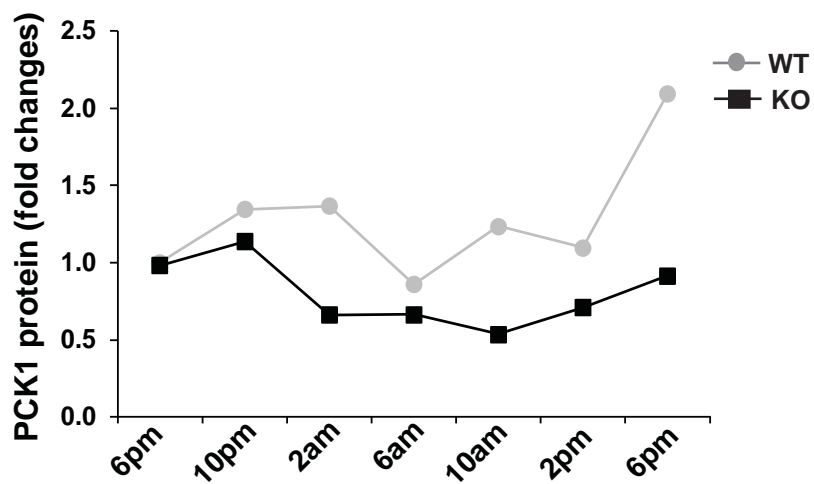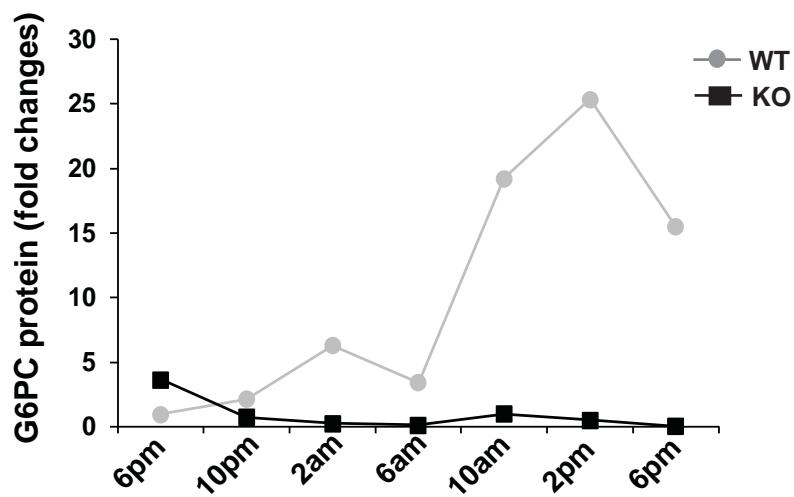

**S-Table 1**

| Group                | Target region | Organism | Primer name | 5'- Sequence -3'           |
|----------------------|---------------|----------|-------------|----------------------------|
| ChIP-qPCR            | Pygl promotor | Mus      | msPygl-F    | ACT GGG AAC TCA ACA AGC GA |
|                      |               |          | msPygl-R    | CTT GCT GCT TTT GAG ACG CT |
|                      | Pck1 promotor | Mus      | msPck1-F    | CACCTAGTGAGGTAACACAC       |
|                      |               |          | msPck1-R    | TCATATGTTGCTGGCTGCAC       |
|                      | G6P promotor  | Mus      | msG6pc-F    | TACGTAATCACCCCTGAACATG     |
|                      |               |          | msG6pc-R    | CAAGGCACAGACTGATAGCA       |
| Gene expression qPCR | Pygl          | Mus      | msPygl-F    | CCT ATG GCT ACG GCA TTC GT |
|                      |               |          | msPygl-R    | TCT CCC AAG GGT TTC CAT GC |
|                      | Pck1          | Mus      | msPck1-F    | CTC AGC TGC ATA ACG GTC TG |
|                      |               |          | msPck1-R    | CTT CAG CTT GCG GAT GAC AC |
|                      | G6pc          | Mus      | msG6P-F     | CTGTCACCTGTGAGACCGGA       |
|                      |               |          | msG6P-R     | AGATGACGTTCAAACACCGGAA     |
|                      | Acc1          | Mus      | msAcc1-F    | CAGTAACCTGGTGAAGCTGGA      |
|                      |               |          | msAcc1-R    | GCCAGACATGCTGGATCTCAT      |
|                      | Comt          | Mus      | msComt-1F   | GTGTCAGAGCCCGTGTCGG        |
|                      |               |          | msComt-1R   | AGGACTCTCTCATCCCCTCGT      |
|                      | Gys2          | Mus      | msGys2-F    | CCAGCTTGACAAGTTCGACA       |
|                      |               |          | msGys2-R    | ATCAGGCTTCCTCTTCAGCA       |
|                      | Gsk3b         | Mus      | msGsk3b-F   | TCCATTCCCTTTGGAATCTGC      |
|                      |               |          | msGsk3b-R   | CAATTCAGCCAACACACACAGC     |
|                      | Ugp2          | Mus      | msUgp2-F    | ACCTGGGATACCTGCCGTG        |
|                      |               |          | MsUgp2-R    | CCTGCTCACCCCTTCCTTC        |
|                      | Phka2         | Mus      | msPhka2-F   | TTATGGGATGTGGGAGCGTG       |
|                      |               |          | msPhka2-R   | TGACTGGCAGTGCTCAACTT       |
|                      | Gbe1          | Mus      | msGbe1-F    | ACACCAGGGAAGTTCAAATTTGTAC  |
|                      |               |          | msGbe1-R    | GTGTTGTGGTCCAGTCTCTGATG    |
|                      | Agl           | Mus      | msAgl-F     | TTGAGGTCGGGAGACTGGAT       |
|                      |               |          | MsAgl-R     | GCGTCAAAGTAGCAGGGGAT       |

**Mouse Pck1 gene promoter oligo probes for EMSA**

mPCK1 EMSA-F-1 : 5'-Biotin-CCTTCTCATGACCTTTGGCCGTGGGAGTGACACCTCACAG-3'

mPCK1 EMSA-R-1 : 5'-Biotin-CTGTGAGGTGTCACTCCCACGGCCAAAGGTCATGAGAAGG-3'
